# Supplementary material
Source: Elsevier journal article supplement (https://comptes-rendus.academie-sciences.fr/geoscience/article/10.1016/j.crte.2015.02.008/file/attach/mmc2.pdf)
Supplement: mmc2 [file mmc2.pdf]

| As    | Ba    | Be    | Bi    | Cd     | Ce    | Co    | Cr    | Cs    | Cu    | Dy    | Er    | Eu    | Ga    |
|-------|-------|-------|-------|--------|-------|-------|-------|-------|-------|-------|-------|-------|-------|
| ppm   | ppm   | ppm   | ppm   | ppm    | ppm   | ppm   | ppm   | ppm   | ppm   | ppm   | ppm   | ppm   | ppm   |
| 37.04 | 496.9 | 2.06  | 0.415 | 0.475  | 78.08 | 71.48 | 88.77 | 5.249 | 612.1 | 4.414 | 2.456 | 1.286 | 19.94 |
| 37.02 | 530   | 2.01  | 0.225 | 0.271  | 78.4  | 40.4  | 105.8 | 4.716 | 50.91 | 4.542 | 2.539 | 1.387 | 20.52 |
| 48.8  | 633   | 2.231 | 0.238 | 0.159  | 85.94 | 26.12 | 93.02 | 5.747 | 18.45 | 4.974 | 2.804 | 1.477 | 21.95 |
| 67.32 | 559.9 | 2.207 | 0.248 | 0.176  | 94.41 | 23.57 | 90.69 | 5.018 | 30.7  | 5.207 | 2.78  | 1.649 | 21.41 |
| 20.6  | 722.4 | 2.092 | 0.229 | 0.165  | 92.22 | 20.05 | 86.98 | 4.961 | 28.48 | 4.913 | 2.751 | 1.542 | 21.71 |
| 29.63 | 605.4 | 2.185 | 0.279 | 0.233  | 89.99 | 21.33 | 78.51 | 5.565 | 29.22 | 5.263 | 2.854 | 1.571 | 21.44 |
| 35.11 | 523.7 | 1.856 | 0.282 | 0.213  | 98.89 | 21.75 | 78.11 | 4.878 | 20.56 | 5.096 | 2.611 | 1.599 | 18.88 |
| 63.96 | 715.2 | 2.198 | 0.24  | 0.221  | 91.17 | 24.08 | 59.12 | 4.185 | 20.02 | 4.499 | 2.37  | 1.443 | 18.04 |
| 57.25 | 569.8 | 2.274 | 0.31  | 0.221  | 105.3 | 48.09 | 63.67 | 5.673 | 42.44 | 6.003 | 3.097 | 1.82  | 21.64 |
| 53.38 | 563.7 | 2.152 | 0.291 | 0.253  | 109.2 | 69.3  | 64.99 | 5.313 | 49.23 | 6.096 | 3.308 | 1.797 | 20.38 |
| 66.63 | 646.5 | 2.484 | 0.265 | < L.D. | 127.5 | 56.27 | 74.3  | 5.625 | 69.72 | 6.722 | 3.612 | 2.008 | 24.04 |
| 8.278 | 1219  | 2.609 | 0.297 | 0.726  | 174.6 | 26.26 | 141.3 | 7.798 | 76.27 | 6.024 | 3.161 | 2.003 | 22.52 |
| 19.53 | 742.9 | 3.894 | 0.268 | 0.156  | 179.3 | 17.42 | 71.82 | 6.69  | 58.34 | 6.682 | 3.55  | 1.991 | 24.15 |
| 108.4 | 2028  | 2.954 | 0.35  | 0.775  | 391.8 | 129.7 | 102.1 | 5.604 | 147.5 | 13.05 | 6.16  | 4.047 | 28.09 |
| 52.29 | 1004  | 1.929 | 0.32  | 0.75   | 180   | 203.1 | 65.22 | 6.625 | 86.56 | 6.772 | 3.692 | 2.09  | 24.08 |
| 20.56 | 943.7 | 2.515 | 0.281 | 1.091  | 175.6 | 20.23 | 139.2 | 6.712 | 88.86 | 6.01  | 3.142 | 1.977 | 20.66 |
| 51.12 | 3047  | 3.006 | 0.247 | 6.964  | 87.81 | 26.86 | 254.7 | 4.171 | 264   | 7.15  | 3.887 | 2.068 | 17.75 |
| 26.55 | 1937  | 3.249 | 0.3   | 5.404  | 114   | 21.5  | 204.8 | 4.988 | 155.7 | 7.097 | 3.849 | 2.289 | 17.52 |
| 15.37 | 1686  | 1.966 | 0.324 | 2.697  | 206.7 | 23.86 | 135.8 | 6.612 | 118.3 | 7.094 | 3.652 | 2.362 | 19.35 |
| 159.8 | 2092  | 1.463 | 0.532 | 1.334  | 48.34 | 122.5 | 70.06 | 4.57  | 116.9 | 3.394 | 1.837 | 1.016 | 13.92 |
| 187.9 | 1275  | 1.785 | 0.461 | 2.286  | 55.72 | 153.5 | 62.1  | 3.278 | 171.9 | 4.849 | 2.574 | 1.448 | 12.27 |
| 106.2 | 1117  | 1.763 | 0.401 | 1.241  | 48.78 | 114.2 | 67.39 | 4.194 | 88.15 | 3.893 | 2.147 | 1.111 | 13.67 |
| 21.81 | 186.7 | 1.427 | 0.246 | 0.834  | 54.65 | 21.78 | 51.04 | 2.503 | 48.4  | 3.423 | 1.746 | 1.19  | 9.363 |
| 15.37 | 131.8 | 1.557 | 0.179 | 1.108  | 56.26 | 19.61 | 46.05 | 2     | 38.75 | 4.779 | 2.508 | 1.397 | 7.276 |
| 19    | 135.5 | 1.692 | 0.153 | 1.537  | 82.26 | 24.51 | 61.93 | 2.534 | 56.24 | 6.218 | 3.164 | 1.899 | 9.681 |
| 17.2  | 78.02 | 1.33  | 0.214 | 2.154  | 38.99 | 19.12 | 34.22 | 1.888 | 50.43 | 3.062 | 1.525 | 0.961 | 6.372 |
